# Supplementary material
Source: PubMed Central journal article supplement (PMC3655747)
Supplement: 1062-6050-48.2.02.S1.pdf [file 1062-6050-48.2.02.S1.pdf]

**Table S1. Cohen Effect Sizes for Between-Time Comparisons (Preinfusion to Infusion and Infusion to Postinfusion) for Each Condition (Control, Pain, and Sham)<sup>a</sup>**

|                                            | Session                 |                          |                         |                          |                         |                          |
|--------------------------------------------|-------------------------|--------------------------|-------------------------|--------------------------|-------------------------|--------------------------|
|                                            | Control                 |                          | Sham                    |                          | Pain                    |                          |
|                                            | Preinfusion to Infusion | Infusion to Postinfusion | Preinfusion to Infusion | Infusion to Postinfusion | Preinfusion to Infusion | Infusion to Postinfusion |
| Walking kinetic dependent variables        |                         |                          |                         |                          |                         |                          |
| Peak impact GRF (BW)*                      | 0.25                    | 0.25                     | < 0.01                  | 0.00                     | 0.57                    | 0.77                     |
| Peak push-off GRF (BW)*                    | 0.20                    | < 0.01                   | 0.18                    | 0.20                     | 0.86                    | 1.00                     |
| Peak braking GRF (BW)*                     | 0.26                    | 0.13                     | 0.17                    | 0.17                     | 0.67                    | 0.66                     |
| Peak lateral GRF (BW × 10 <sup>-2</sup> )* | 0.06                    | 0.07                     | 0.39                    | 0.33                     | 0.78                    | 1.10                     |
| Peak support moment (Nm)*                  | 0.08                    | 0.05                     | 0.04                    | 0.04                     | 0.34                    | 0.40                     |
| Hip contribution, %                        | 0.22                    | < 0.01                   | 0.25                    | 0.22                     | < 0.01                  | 0.18                     |
| Knee contribution, %                       | < 0.01                  | 0.17                     | 0.15                    | 0.14                     | 0.13                    | < 0.01                   |
| Ankle contribution, %                      | 0.20                    | < 0.01                   | < 0.01                  | < 0.01                   | 0.20                    | 0.20                     |
| Peak hip-extension moment (Nm)             | 0.15                    | 0.02                     | 0.22                    | 0.12                     | 0.21                    | 0.30                     |
| Peak hip-flexion moment (Nm)               | 0.14                    | 0.09                     | 0.16                    | 0.13                     | 0.34                    | 0.46                     |
| Peak hip-abduction moment (Nm)*            | 0.03                    | 0.17                     | 0.23                    | 0.11                     | 0.78                    | 0.42                     |
| Peak knee-extension moment (Nm)*           | 0.06                    | 0.09                     | 0.08                    | 0.05                     | 0.33                    | 0.28                     |
| Peak knee-abduction moment (Nm)            | 0.11                    | 0.11                     | 0.15                    | 0.33                     | 0.15                    | 0.41                     |
| Peak plantar-flexion moment (Nm)*          | 0.01                    | 0.03                     | 0.05                    | 0.09                     | 0.30                    | 0.37                     |
| Walking kinematic dependent variables      |                         |                          |                         |                          |                         |                          |
| Peak hip-extension angle (°)               | 0.17                    | 0.11                     | 0.45                    | 0.55                     | 0.06                    | 0.35                     |
| Peak hip-flexion angle (°)                 | 0.33                    | 0.03                     | 0.06                    | 0.01                     | 0.18                    | 0.02                     |
| Peak hip-adduction angle (°)               | 0.05                    | 0.18                     | 0.09                    | 0.11                     | 0.52                    | 0.44                     |
| Peak knee-flexion angle (°)                | 0.52                    | 0.07                     | 0.39                    | 0.12                     | 0.19                    | < 0.01                   |
| Peak knee-adduction angle (°)              | 0.22                    | 0.18                     | 0.02                    | 0.02                     | 0.03                    | 0.34                     |
| Peak dorsiflexion angle (°)                | 0.12                    | 0.06                     | 0.05                    | 0.12                     | 0.27                    | 0.17                     |
| Peak plantar-flexion angle (°)*            | 0.09                    | 0.16                     | 0.01                    | 0.45                     | 0.58                    | 0.70                     |
| Stance time (s)                            | 0.18                    | 0.18                     | 0.06                    | 0.01                     | 0.22                    | 0.16                     |
| Walking speed (m/s)                        | 0.15                    | 0.18                     | 0.02                    | 0.10                     | 0.16                    | 0.28                     |
| Running kinematic dependent variables      |                         |                          |                         |                          |                         |                          |

|                                 |      |      |      |      |      |      |
|---------------------------------|------|------|------|------|------|------|
| Peak hip-extension angle (°)    | 0.15 | 0.02 | 0.30 | 0.36 | 0.19 | 0.47 |
| Peak hip-flexion angle (°)      | 0.03 | 0.01 | 0.53 | 0.22 | 0.39 | 0.07 |
| Peak hip-adduction angle (°)*   | 0.02 | 0.03 | 0.12 | 0.10 | 0.53 | 0.38 |
| Peak knee-flexion angle (°)     | 0.39 | 0.03 | 0.25 | 0.15 | 0.16 | 0.22 |
| Peak knee adduction angle (°)   | 0.02 | 0.07 | 0.01 | 0.02 | 0.32 | 0.07 |
| Peak dorsiflexion angle (°)     | 0.02 | 0.10 | 0.17 | 0.28 | 0.27 | 0.32 |
| Peak plantar-flexion angle (°)* | 0.25 | 0.01 | 0.05 | 0.20 | 0.57 | 0.52 |
| Stance time (s)                 | 0.30 | 0.12 | 0.31 | 0.23 | 0.06 | 0.09 |

Abbreviations: BW, body weight; GRF, ground reaction force.

<sup>a</sup> Asterisks indicate dependent variables that demonstrated condition × time interactions and between-time differences for the pain condition.
